# Supplementary material for: Improved Detection of Circulating miRNAs in Serum and Plasma Following Rapid Heat/Freeze Cycling
Source: PubMed Central journal article supplement — Microrna. 2018 Aug;7(2):138–47. doi: 10.2174/2211536607666180416152112 (PMC6198569; doi:10.2174/2211536607666180416152112), 2018-08
Supplement: MIRNA-7-138_SD1.pdf [file MIRNA-7-138_SD1.pdf]

## Supplementary Material

### Improved Detection of Circulating MiRNAs in Serum and Plasma Following Rapid Heat/Freeze Cycling

Peter D. Mariner<sup>1</sup>, Armin Korst<sup>2</sup>, Anis Karimpour-Fard<sup>3</sup>, Brian L. Stauffer<sup>2,4</sup>, Shelley D. Miyamoto<sup>5</sup> and Carmen C. Sucharov<sup>2,\*</sup>

<sup>1</sup>CoramiR Biomedical, Superior, CO, 80027, USA; <sup>2</sup>Department of Medicine, Division of Cardiology, University of Colorado Denver, Anschutz Medical Campus, Aurora, CO, 80045, USA; <sup>3</sup>Department of Pharmacology, University of Colorado Denver, Anschutz Medical Campus, Aurora, CO, 80045, USA; <sup>4</sup>Department of Medicine, Division of Cardiology, Denver Health and Hospital Authority, Denver, CO, 80045, USA; <sup>5</sup>Department of Pediatrics, Division of Cardiology, University of Colorado Anschutz Medical Campus, Children's Hospital Colorado, Aurora, CO, 80045, USA

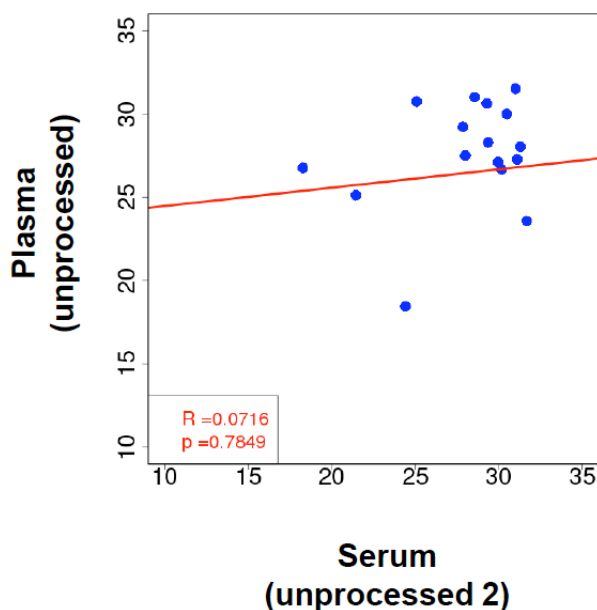

**Figure S1:** Extraction-free miRNA detection results in low number of detected miRNAs. Regression analysis of one unprocessed serum sample and unprocessed plasma sample is shown.

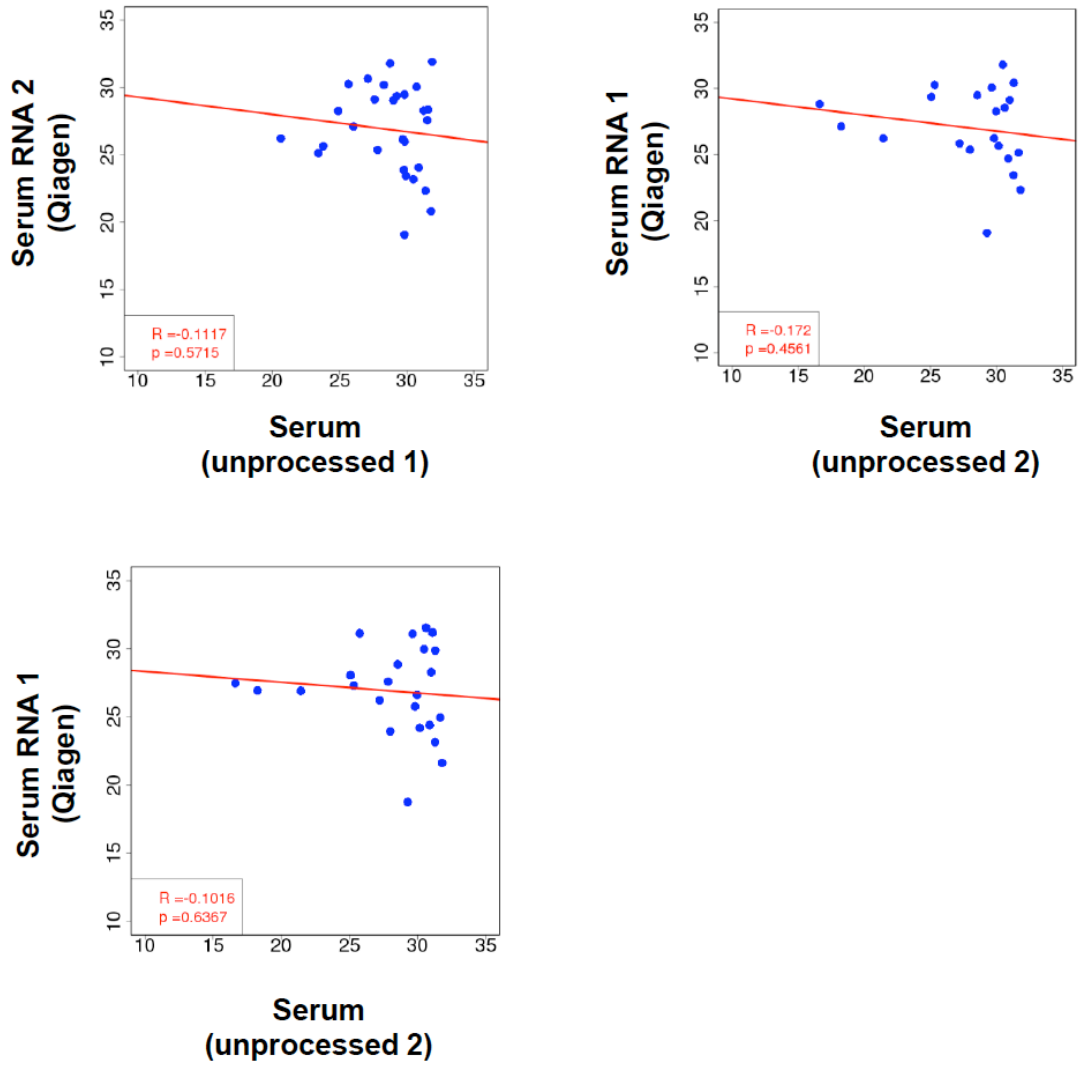

**Figure S2:** miRNA extraction substantially increases the number of miRNAs. Regression analysis between unprocessed serum samples and RNA-extracted samples is shown.

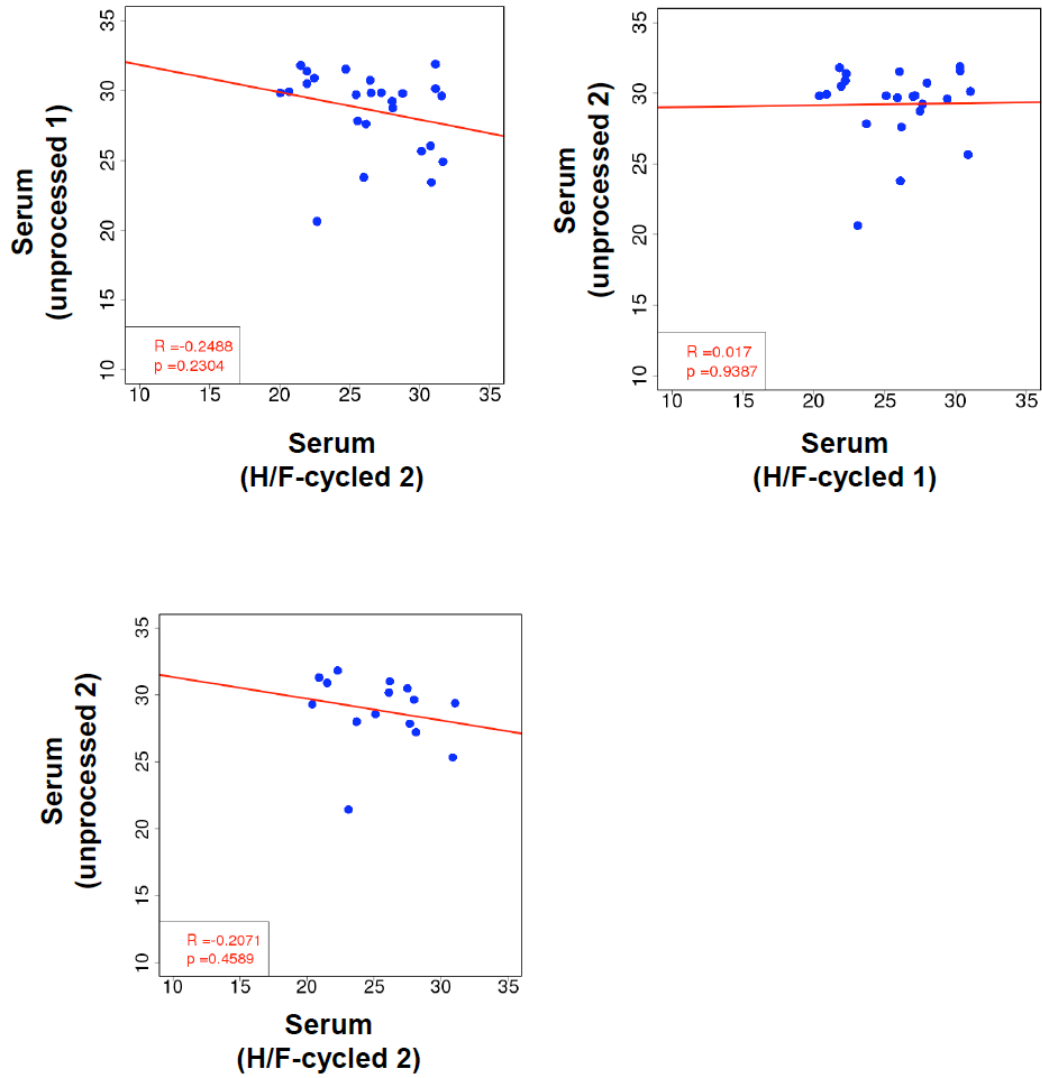

**Figure S3:** Heat/Freeze (H/F) cycle significantly improves miRNA detection. Regression analysis between unprocessed serum samples and H/F samples is shown.

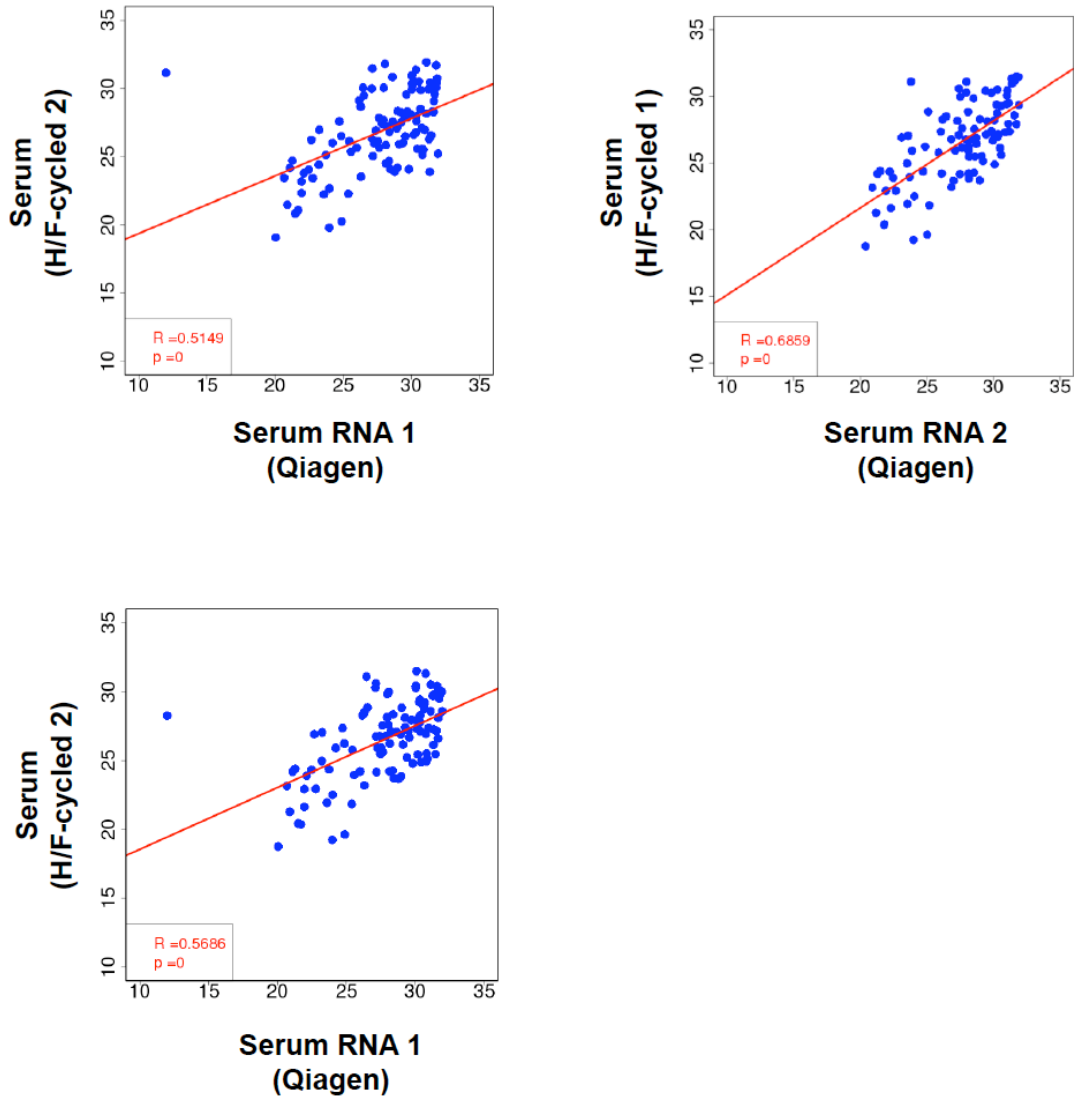

**Figure S4:** miRNA detection from H/F cycle and RNA extraction is comparable. Regression analysis between RNA-extracted samples and H/F samples is shown.

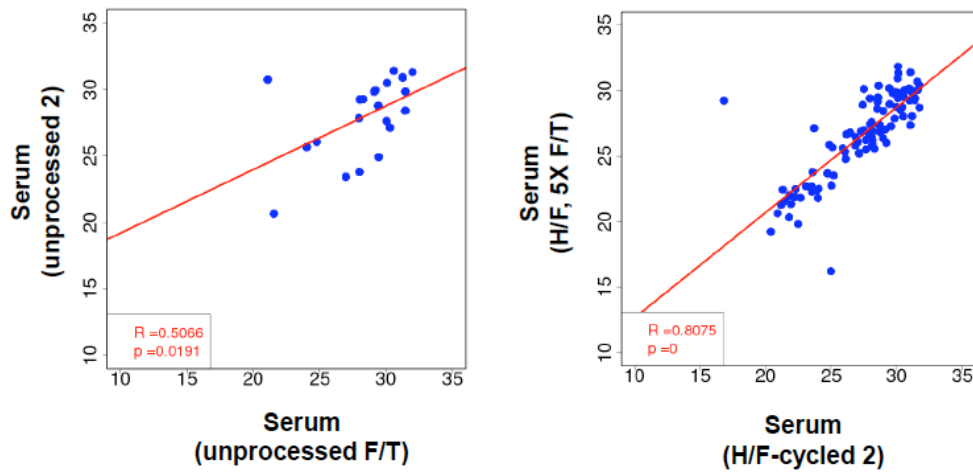

**Figure S5:** Repeated Freeze/Thaw (F/T) negatively impacts miRNA detection in unprocessed samples but improves it after Heat/Freeze (H/F) cycle. Regression analysis between unprocessed, unprocessed F/T, H/F and H/F plus 5 F/T cycles is shown.

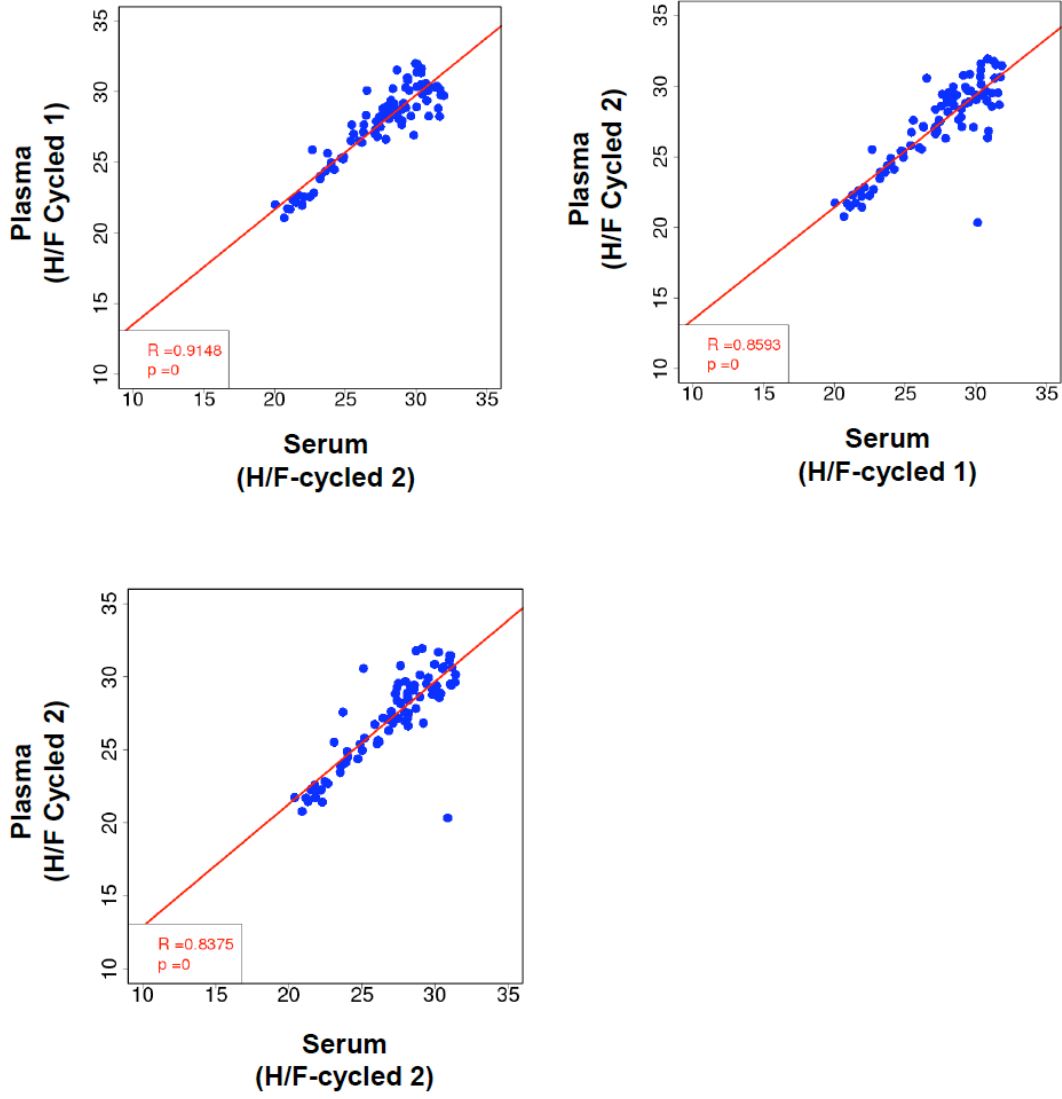

**Figure S6:** Heat/Freeze (H/F) cycle significantly improves miRNA detection in plasma samples. Correlation between plasma and serum samples after H/F cycle is shown.

| miRNAs          | Serum Sample H/F | Serum Sample H/F | Plasma Sample H/F | Plasma Sample H/F | Serum Standard Sample F/T | Serum Standard Sample | Serum Standard Sample | Plasma Standard Sample | Serum Sample H/F, 5X F/T | RNA Sample | RNA Sample |
|-----------------|------------------|------------------|-------------------|-------------------|---------------------------|-----------------------|-----------------------|------------------------|--------------------------|------------|------------|
| ath-miR159a     | NA               | NA               | NA                | NA                | NA                        | 28.76                 | NA                    | NA                     | NA                       | 31.506     | NA         |
| hsa-let-7a-5p   | NA               | NA               | NA                | NA                | NA                        | NA                    | NA                    | NA                     | 31.477                   | 31.28      | 29.155     |
| hsa-let-7b-5p   | 22.474           | 22.112           | 22.835            | 22.56             | NA                        | NA                    | NA                    | NA                     | 19.815                   | 23.892     | 23.776     |
| hsa-let-7c-5p   | 31.731           | 29.715           | NA                | NA                | NA                        | NA                    | NA                    | NA                     | 28.7                     | 27.912     | 28.308     |
| hsa-let-7d-5p   | NA               | NA               | 29.97             | 28.919            | NA                        | NA                    | NA                    | NA                     | 30.201                   | 27.046     | 27.955     |
| hsa-let-7e-5p   | NA               | 29.827           | 27.092            | 26.906            | NA                        | NA                    | NA                    | NA                     | 28.429                   | 24.782     | 24.07      |
| hsa-let-7f-5p   | NA               | NA               | NA                | NA                | NA                        | NA                    | NA                    | NA                     | NA                       | NA         | 16.665     |
| hsa-let-7g-5p   | 30.089           | 28.638           | NA                | 31.518            | NA                        | NA                    | NA                    | NA                     | 31.821                   | 27.085     | 27.54      |
| hsa-mir-100-5p  | NA               | 31.361           | NA                | NA                | NA                        | NA                    | NA                    | NA                     | 30.585                   | 27.241     | 23.875     |
| hsa-mir-1-3p    | NA               | NA               | NA                | NA                | NA                        | NA                    | NA                    | NA                     | NA                       | NA         | NA         |
| hsa-mir-101-3p  | NA               | 29.737           | NA                | NA                | NA                        | NA                    | NA                    | NA                     | 29.443                   | 27.96      | 27.898     |
| hsa-mir-103a-3p | 30.598           | 27.64            | NA                | 28.803            | NA                        | NA                    | NA                    | NA                     | 30.031                   | 25.605     | 25.666     |
| hsa-miR-105-5p  | NA               | NA               | NA                | NA                | NA                        | NA                    | 13.194                | NA                     | NA                       | NA         | NA         |
| hsa-miR-106a-5p | 24.045           | 23.995           | 24.521            | 24.967            | NA                        | NA                    | NA                    | NA                     | 22.504                   | 22.504     | 22.648     |
| hsa-miR-106b-5p | 26.999           | 28.784           | 27.621            | 28.058            | NA                        | 29.785                | NA                    | NA                     | 26.066                   | 23.673     | 23.88      |
| hsa-miR-107     | NA               | NA               | NA                | NA                | NA                        | NA                    | NA                    | NA                     | NA                       | 30.342     | NA         |
| hsa-miR-10a-5p  | NA               | NA               | NA                | NA                | NA                        | NA                    | NA                    | NA                     | NA                       | 30.489     | 29.321     |
| hsa-miR-10b-5p  | NA               | NA               | NA                | NA                | NA                        | NA                    | NA                    | NA                     | 29.876                   | NA         | NA         |
| hsa-miR-122-5p  | 29.207           | 30.884           | 26.818            | 28.251            | NA                        | NA                    | NA                    | NA                     | 26.007                   | 25.144     | 25.515     |
| hsa-miR-125a-3p | NA               | NA               | NA                | NA                | NA                        | NA                    | NA                    | NA                     | NA                       | NA         | NA         |
| hsa-miR-125a-5p | 30.112           | 30.024           | 29.041            | 28.911            | NA                        | NA                    | NA                    | NA                     | 31.347                   | NA         | 30.937     |
| hsa-miR-125b-5p | NA               | 30.188           | 29.32             | NA                | NA                        | NA                    | NA                    | NA                     | 27.794                   | 25.443     | 26.607     |
| hsa-miR-126-3p  | 22.29            | 21.946           | 21.426            | 21.938            | 30.583                    | 31.38                 | 31.805                | NA                     | 22.481                   | 21.623     | 22.322     |
| hsa-miR-127-3p  | NA               | NA               | NA                | NA                | NA                        | NA                    | NA                    | NA                     | NA                       | 29.369     | 31.355     |
| hsa-miR-127-5p  | NA               | NA               | NA                | NA                | NA                        | NA                    | NA                    | NA                     | NA                       | NA         | NA         |
| hsa-miR-128-3p  | NA               | NA               | NA                | 31.518            | NA                        | NA                    | NA                    | NA                     | NA                       | 30.989     | 28.949     |
| hsa-miR-129-5p  | NA               | NA               | NA                | NA                | NA                        | NA                    | NA                    | NA                     | NA                       | NA         | NA         |
| hsa-miR-130a-3p | 29.119           | 30.832           | 31.93             | 30.071            | 30.722                    | NA                    | NA                    | NA                     | 27.011                   | 25.51      | 25.571     |
| hsa-miR-130b-3p | 29.467           | 31.542           | NA                | NA                | NA                        | NA                    | NA                    | NA                     | 28.965                   | 27.149     | 28.301     |
| hsa-miR-132-3p  | 31.166           | 31.733           | 30.627            | 29.751            | NA                        | NA                    | NA                    | NA                     | 28.041                   | 29.506     | 29.575     |
| hsa-miR-133a-3p | 30.985           | 30.34            | 31.122            | NA                | NA                        | NA                    | NA                    | NA                     | 29.246                   | 29.416     | 31.368     |
| hsa-miR-133b    | NA               | NA               | NA                | NA                | NA                        | NA                    | NA                    | NA                     | NA                       | NA         | NA         |
| hsa-miR-135a-5p | NA               | NA               | NA                | NA                | NA                        | NA                    | NA                    | NA                     | NA                       | NA         | NA         |
| hsa-miR-135b-5p | NA               | NA               | NA                | NA                | NA                        | NA                    | NA                    | NA                     | NA                       | NA         | NA         |
| hsa-miR-136-5p  | NA               | NA               | 31.635            | NA                | NA                        | NA                    | NA                    | NA                     | NA                       | NA         | NA         |
| hsa-miR-138-5p  | NA               | NA               | NA                | NA                | NA                        | NA                    | NA                    | NA                     | NA                       | 31.438     | NA         |
| hsa-miR-139-3p  | 31.04            | 31.129           | 29.491            | NA                | NA                        | 30.136                | 29.367                | 28.293                 | 27.352                   | NA         | NA         |
| hsa-miR-139-5p  | 28.687           | 28.951           | 27.817            | 28.723            | NA                        | NA                    | NA                    | NA                     | 27.372                   | 26.894     | 27.075     |
| hsa-miR-140-3p  | 28.509           | 27.971           | 29.161            | 28.97             | NA                        | NA                    | NA                    | NA                     | 28.607                   | 29.841     | 30.043     |
| hsa-miR-141-3p  | NA               | NA               | NA                | NA                | NA                        | NA                    | NA                    | NA                     | NA                       | NA         | NA         |
| hsa-miR-142-3p  | 30.495           | 31.32            | 30.561            | 30.299            | NA                        | NA                    | NA                    | NA                     | 28.026                   | 26.133     | 26.275     |
| hsa-miR-142-5p  | 31.606           | NA               | NA                | NA                | NA                        | NA                    | NA                    | NA                     | 30.045                   | 31.183     | NA         |
| hsa-miR-143-3p  | 28.701           | NA               | 31.77             | NA                | NA                        | NA                    | NA                    | NA                     | 26.855                   | 26.433     | 26.758     |
| hsa-miR-145-5p  | 31.123           | 29.94            | 29.396            | 31.988            | NA                        | NA                    | NA                    | NA                     | 29.953                   | 27.933     | 28.099     |
| hsa-miR-146a-5p | 21.928           | 21.944           | 22.217            | 22.062            | 30.077                    | 30.491                | NA                    | NA                     | 21.331                   | 22.92      | 23.173     |
| hsa-miR-146b-5p | 24.866           | 24.856           | 25.378            | 25.237            | NA                        | NA                    | NA                    | NA                     | 25.849                   | 26.226     | 26.503     |

|                 |        |        |        |        |        |        |        |        |        |        |        |
|-----------------|--------|--------|--------|--------|--------|--------|--------|--------|--------|--------|--------|
| hsa-miR-146b-3p | NA     |
| hsa-miR-147a    | NA     |
| hsa-miR-147b    | NA     |
| hsa-miR-148a-3p | 28.618 | 31.466 | NA     | 30.385 | NA     | NA     | NA     | NA     | 30.359 | 25.467 | 26.557 |
| hsa-miR-148b-3p | NA     | 31.912 | NA     | 30.004 | 30.74  |
| hsa-miR-149-5p  | NA     |
| hsa-miR-150-5p  | 21.174 | 20.896 | 21.687 | 21.723 | 30.805 | NA     | NA     | 31.117 | 21.28  | 21.274 | 21.468 |
| hsa-miR-152-3p  | NA     | 30.359 | 31.587 | 31.319 | NA     | NA     | NA     | NA     | 29.107 | 27.783 | 27.954 |
| hsa-miR-154-5p  | NA     |
| hsa-miR-155-5p  | 26.174 | 26.166 | 25.54  | 26.394 | 30.033 | 27.61  | 31.005 | 31.513 | 26.664 | 28.277 | 29.124 |
| hsa-miR-15a-5p  | NA     | 31.958 | NA     | 29.705 | 12.439 | NA     | NA     | NA     | NA     | 28.57  | 25.206 |
| hsa-miR-15b-5p  | 31.218 | 30.98  | NA     | NA     | NA     | NA     | NA     | NA     | 29.839 | 27.361 | 26.952 |
| hsa-miR-16-5p   | 21.819 | 21.498 | 21.732 | 22.162 | NA     | 31.799 | NA     | NA     | 22.013 | 20.414 | 20.819 |
| hsa-miR-17-3p   | 23.527 | 23.588 | 23.913 | 24.357 | NA     | NA     | NA     | 21.75  | 22.272 | 21.931 | 22.229 |
| hsa-miR-181a-5p | NA     | NA     | NA     | NA     | NA     | 31.245 | NA     | NA     | NA     | 28.942 | 28.286 |
| hsa-miR-181c-5p | NA     |
| hsa-miR-182-3p  | NA     |
| hsa-miR-183-5p  | NA     | 31.321 | NA     |
| hsa-miR-184     | NA     |
| hsa-miR-185-5p  | NA     | 28.389 | 29.951 | 28.676 | NA     | NA     | NA     | NA     | 27.654 | 28.339 | 26.822 |
| hsa-miR-186-5p  | 26.45  | 26.288 | 27.166 | 27.125 | NA     | NA     | NA     | NA     | 26.793 | 28.484 | 28.653 |
| hsa-miR-188-3p  | NA     | 30.072 |
| hsa-miR-18a-5p  | NA     | NA     | 28.836 | 30.332 | NA     | NA     | NA     | NA     | 27.21  | 25.598 | 27.305 |
| hsa-miR-18b-5p  | NA     | 31.492 | 31.581 | 31.418 |
| hsa-miR-190a-5p | NA     |
| hsa-miR-191-5p  | 21.307 | 21.095 | 21.46  | 21.659 | 31.942 | NA     | NA     | 31.2   | 22.426 | 24.184 | 24.153 |
| hsa-miR-192-5p  | 27.935 | 27.405 | 27.576 | 28.197 | NA     | NA     | NA     | NA     | 26.629 | 26.766 | 26.911 |
| hsa-miR-193a-3p | NA     |
| hsa-miR-193a-5p | NA     | NA     | 28.914 | NA     | NA     | NA     | NA     | 29.431 | 31.581 | 30.326 | 29.436 |
| hsa-miR-193b-3p | 27.292 | 27.949 | 28.832 | 28.287 | NA     | NA     | NA     | NA     | 26.898 | 28.154 | 27.682 |
| hsa-miR-194-5p  | NA     | 31.856 | NA     | NA     | NA     | NA     | 31.31  | NA     | 31.774 | 29.876 | 30.424 |
| hsa-miR-195-5p  | 27.474 | 27.181 | 27.144 | 27.895 | NA     | NA     | NA     | NA     | 26.988 | 24.154 | 25.034 |
| hsa-miR-196b-5p | NA     | NA     | NA     | 31.986 | NA     | NA     | NA     | NA     | 31.323 | NA     | NA     |
| hsa-miR-197-3p  | 24.717 | 23.736 | 24.368 | 25.639 | NA     | NA     | NA     | NA     | 23.682 | 24.359 | 25.127 |
| hsa-miR-198     | NA     |
| hsa-miR-199a-5p | NA     | 30.207 | 30.3   |
| hsa-miR-199a-3p | 30.371 | 29.496 | 28.861 | 30.083 | NA     | NA     | NA     | NA     | 29.756 | 27.151 | 28.033 |
| hsa-miR-199b-5p | NA     | 31.611 | NA     |
| hsa-miR-19a-3p  | 28.176 | 27.477 | 27.49  | 27.494 | NA     | NA     | NA     | NA     | 26.887 | 25.467 | 26.117 |
| hsa-miR-19b-3p  | 21.779 | 21.691 | 22.589 | 22.701 | 29.593 | NA     | NA     | NA     | 20.322 | 20.361 | 21.076 |
| hsa-miR-200a-3p | NA     | 31.654 | 28.672 | 28.238 | 29.447 | 24.9   | 29.967 | 27.114 | 30.748 | 26.602 | 28.268 |
| hsa-miR-200b-3p | NA     | NA     | NA     | 31.988 | NA     |
| hsa-miR-200c-3p | 31.065 | 31.832 | 31.447 | NA     | 31.698 |
| hsa-miR-202-3p  | NA     | NA     | NA     | NA     | NA     | 28.289 | NA     | 29.741 | NA     | 27.602 | 30.204 |
| hsa-miR-203a-3p | NA     | NA     | 30.888 | NA     | NA     | NA     | NA     | NA     | 31.755 | 26.803 | 29.985 |
| hsa-miR-204-5p  | NA     | 26.558 | 26.988 |
| hsa-miR-205-5p  | NA     | 30.689 | NA     | 29.202 | 29.893 |
| hsa-miR-208a-3p | 27.66  | 28.031 | 28.166 | 28.888 | 28.029 | 29.228 | 27.846 | 29.227 | 25.508 | 27.6   | NA     |
| hsa-miR-208b-3p | NA     | 18.74  | NA     |

|                   |        |        |        |        |        |        |        |        |        |        |        |
|-------------------|--------|--------|--------|--------|--------|--------|--------|--------|--------|--------|--------|
| hsa-miR-20a-5p    | 25.022 | 24.883 | 24.961 | 25.38  | NA     | NA     | NA     | NA     | 22.743 | 19.62  | 20.258 |
| hsa-miR-20b-5p    | 28.11  | 27.539 | 28.592 | 28.254 | NA     | NA     | NA     | NA     | 26.425 | 25.924 | 26.136 |
| hsa-miR-210-3p    | 28.309 | 28.632 | 29.375 | 28.291 | NA     | NA     | NA     | NA     | 25.552 | NA     | NA     |
| hsa-miR-21-5p     | 28.962 | 28.461 | 28.623 | 29.117 | NA     | NA     | NA     | NA     | 26.355 | 23.696 | 24.092 |
| hsa-miR-211-5p    | NA     | 31.123 | 30.645 |
| hsa-miR-211-5p    | 30.313 | NA     | NA     | NA     | NA     | 31.586 | NA     | NA     | 29.772 | 26.927 | 28.358 |
| hsa-miR-214-3p    | 29.948 | NA     | NA     | 31.403 | NA     | NA     | NA     | NA     | 29.873 | NA     | 31.767 |
| hsa-miR-215-5p    | 27.396 | 28.222 | 29.255 | 29.381 | NA     | NA     | NA     | NA     | 26.866 | 27.101 | 27.195 |
| hsa-miR-216a-5p   | NA     |
| hsa-miR-216b-5p   | NA     |
| hsa-miR-217       | NA     |
| hsa-miR-218-5p    | NA     | 30.684 | NA     | 30.575 | NA     | NA     | NA     | NA     | 28.309 | 28.76  | 28.502 |
| hsa-miR-219a-5p   | NA     | 29.202 |
| hsa-miR-219a-1-3p | NA     |
| hsa-miR-219a-2-3p | NA     |
| hsa-miR-220a      | NA     |
| hsa-miR-22-3p     | NA     | NA     | 14.16  | NA     | NA     | NA     | NA     | NA     | NA     | 30.754 | NA     |
| hsa-miR-220b      | NA     | 19.637 | NA     | NA     | NA     |
| hsa-miR-220c      | NA     |
| hsa-miR-221-3p    | NA     | NA     | 29.474 | 31.611 | NA     | NA     | NA     | NA     | 27.513 | 25.225 | 25.779 |
| hsa-miR-222-3p    | 22.215 | 22.474 | 22.258 | 22.554 | 31.258 | 30.886 | NA     | 31.838 | 21.872 | 24.341 | 24.05  |
| hsa-miR-223-3p    | 20.395 | 20.046 | 21.73  | 22.014 | 29.116 | 29.821 | 29.284 | 30.628 | 19.227 | 18.751 | 19.075 |
| hsa-miR-224-5p    | 23.81  | NA     | NA     | 29.116 | 18.398 | NA     | NA     | NA     | NA     | 31.093 | NA     |
| hsa-miR-23a-3p    | NA     | 31.339 | 29.559 | 28.454 |
| hsa-miR-23b-3p    | NA     |
| hsa-miR-24-3p     | 22.659 | 22.775 | 22.692 | 22.829 | NA     | NA     | NA     | NA     | 21.815 | 22.933 | 23.429 |
| hsa-miR-25-3p     | 28.16  | 28.981 | 28.385 | 27.641 | NA     | NA     | NA     | NA     | 25.863 | 23.853 | 24.164 |
| hsa-miR-26a-5p    | 28.532 | 28.355 | 29.096 | 30.19  | NA     | NA     | NA     | NA     | 29.154 | 24.269 | 24.68  |
| hsa-miR-26b-5p    | 30.084 | 30.44  | 29.373 | 29.812 | NA     | NA     | NA     | NA     | 29.427 | 24.892 | 25.57  |
| hsa-miR-27a-3p    | NA     | 29.402 | 29.71  | 30.797 | NA     | NA     | NA     | 31.286 | 28.226 | 25.216 | 25.994 |
| hsa-miR-27b-3p    | 29.442 | 30.344 | NA     | NA     | NA     | NA     | NA     | NA     | 30.177 | 27.132 | 26.788 |
| hsa-miR-28-5p     | NA     | 30.352 | 29.825 | 29.691 |
| hsa-miR-28-3p     | 28.088 | 29.009 | 27.118 | 27.953 | NA     | NA     | NA     | NA     | 27.57  | 28.836 | 28.331 |
| hsa-miR-296-5p    | NA     | 31.05  | 29.37  | 28.913 |
| hsa-miR-296-3p    | 30.924 | 22.697 | NA     |
| hsa-miR-298       | NA     |
| hsa-miR-299-3p    | NA     |
| hsa-miR-299-5p    | NA     |
| hsa-miR-29a-3p    | 27.133 | 27.253 | 26.84  | 26.813 | NA     | 29.839 | NA     | NA     | 25.21  | 25.94  | 25.997 |
| hsa-miR-29b-3p    | NA     | 31.744 |
| hsa-miR-29c-3p    | 29.552 | 29.254 | 29.933 | 30.275 | NA     | NA     | NA     | 21.081 | 27.261 | 28.108 | 28.258 |
| hsa-miR-301a-3p   | NA     | 31.666 | NA     | 30.186 | NA     | NA     | NA     | NA     | 30.9   | 28.102 | 29.072 |
| hsa-miR-301b-3p   | NA     | 29.684 | 29.699 | NA     |
| hsa-miR-302a-3p   | NA     | NA     | NA     | NA     | NA     | 30.378 | NA     | NA     | NA     | 29.883 | NA     |
| hsa-miR-302b-3p   | NA     | 31.448 | NA     |
| hsa-miR-302c-3p   | NA     | 30.313 | 27.994 |
| hsa-miR-30b-5p    | 26.843 | 26.309 | 27.09  | 27.65  | NA     | NA     | NA     | NA     | 26.45  | 23.186 | 23.523 |
| hsa-miR-30c-5p    | 28.131 | 28.139 | 28.87  | 29.082 | NA     | NA     | NA     | NA     | 27.412 | 24.208 | 24.512 |
| hsa-miR-31-5p     | NA     | NA     | NA     | 31.701 | NA     |





|                 |        |        |        |        |        |        |        |        |        |        |        |
|-----------------|--------|--------|--------|--------|--------|--------|--------|--------|--------|--------|--------|
| hsa-miR-409-5p  | NA     |
| hsa-miR-410-3p  | NA     | 30.997 | 30.907 | NA     |
| hsa-miR-411-5p  | NA     | 30.255 | 30.185 |
| hsa-miR-412-3p  | NA     | 19.075 | NA     |
| hsa-miR-422a    | NA     | 21.558 | 24.883 |
| hsa-miR-423-5p  | NA     | 30.566 | NA     | NA     | NA     | NA     | NA     | NA     | 30.617 | 29.024 | 30.505 |
| hsa-miR-424-5p  | NA     |
| hsa-miR-425-5p  | 26.106 | 26.003 | 25.628 | 26.515 | 28.002 | 23.79  | 30.168 | 26.667 | 24.771 | 24.202 | 25.651 |
| hsa-miR-429     | NA     |
| hsa-miR-431-5p  | NA     |
| hsa-miR-433-3p  | NA     | 29.38  | NA     | 30.973 | NA     | NA     | NA     | NA     | 31.892 | NA     | NA     |
| hsa-miR-448     | NA     |
| hsa-miR-449a    | NA     |
| hsa-miR-449b-5p | NA     |
| hsa-miR-450a-5p | NA     |
| hsa-miR-450b-3p | NA     |
| hsa-miR-450b-5p | NA     | 30.83  | 26.344 | 30.423 | 26.972 | 23.435 | 31.669 | 23.582 | NA     | 24.955 | 25.138 |
| hsa-miR-452-5p  | NA     | 31.16  | NA     |
| hsa-miR-323b-5p | NA     |
| hsa-miR-454-3p  | 27.953 | 27.101 | 26.962 | 26.988 | NA     | NA     | NA     | NA     | 29.401 | 30.292 | 29.986 |
| hsa-miR-455-5p  | NA     | 31.043 | NA     |
| hsa-miR-455-3p  | NA     |
| hsa-miR-483-5p  | 26.044 | 24.722 | 25.411 | 25.278 | NA     | 31.529 | NA     | NA     | 25.319 | 27.349 | 27.571 |
| hsa-miR-484     | 20.9   | 20.679 | 20.786 | 21.068 | 29.203 | 29.93  | 31.291 | 28.033 | 20.637 | 23.153 | 23.437 |
| hsa-miR-485-3p  | NA     | NA     | NA     | NA     | 30.306 | 27.107 | NA     | 29.26  | NA     | 28.368 | 30.658 |
| hsa-miR-485-5p  | NA     |
| hsa-miR-486-5p  | 23.89  | 24.221 | 24.111 | 24.482 | NA     | NA     | NA     | NA     | 22.364 | 25.914 | 25.999 |
| hsa-miR-486-3p  | 31.367 | 30.753 | 29.62  | 29.355 | 25.856 | NA     | NA     | NA     | 29.279 | 31.315 | NA     |
| hsa-miR-487a-3p | NA     | 30.692 | NA     |
| hsa-miR-487b-3p | NA     |
| hsa-miR-488-5p  | NA     |
| hsa-miR-489-3p  | 29.411 | 31.57  | 29.517 | 28.812 | NA     | 29.607 | NA     | NA     | NA     | 30.411 | NA     |
| hsa-miR-490-3p  | NA     |
| hsa-miR-491-3p  | NA     |
| hsa-miR-492     | NA     |
| hsa-miR-493-5p  | NA     |
| hsa-miR-494-3p  | NA     |
| hsa-miR-499a-3p | NA     |
| hsa-miR-500a-3p | NA     |
| hsa-miR-501-5p  | NA     | 30.913 | NA     | NA     |
| hsa-miR-501-3p  | NA     |
| hsa-miR-502-5p  | NA     |
| hsa-miR-502-3p  | NA     |
| hsa-miR-503-5p  | NA     |
| hsa-miR-504-5p  | NA     |
| hsa-miR-505-3p  | NA     | 17.152 | NA     | 13.73  |
| hsa-miR-506-3p  | NA     |
| hsa-miR-507     | NA     |
| hsa-miR-508-3p  | NA     | 20.328 | NA     | NA     | NA     |





|                  |        |        |        |        |        |        |        |        |        |        |        |
|------------------|--------|--------|--------|--------|--------|--------|--------|--------|--------|--------|--------|
| hsa-miR-876-3p   | NA     |
| hsa-miR-876-5p   | NA     |
| hsa-miR-885-3p   | NA     |
| hsa-miR-885-5p   | 25.878 | 25.448 | 26.726 | 27.649 | NA     | 29.691 | NA     | NA     | 25.591 | 25.771 | 26.14  |
| hsa-miR-887-3p   | NA     | NA     | 31.816 | 30.539 | NA     |
| hsa-miR-888-5p   | 13.561 | NA     |
| hsa-miR-889-3p   | NA     |
| hsa-miR-890      | NA     |
| hsa-miR-891a-3p  | NA     |
| hsa-miR-891b     | NA     |
| hsa-miR-892a     | NA     |
| hsa-miR-9-5p     | NA     | 31.844 | NA     |
| hsa-miR-92a-3p   | 25.181 | 25.388 | 25.807 | 26.528 | NA     | NA     | NA     | NA     | 23.519 | 21.829 | 22.275 |
| hsa-miR-95-3p    | NA     |
| hsa-miR-98-5p    | NA     |
| hsa-miR-99a-5p   | 30.063 | NA     | 30.918 | 28.194 | 25.033 |
| hsa-miR-99b-5p   | 30.29  | NA     | NA     | 30.582 | NA     | NA     | NA     | NA     | 28.534 | 28.734 | 28.948 |
| mmu-miR-124-3p   | NA     |
| mmu-miR-129-2-3p | NA     | NA     | 28.986 | NA     | NA     | NA     | NA     | NA     | NA     | 26.142 | NA     |
| mmu-miR-134-5p   | 27.979 | 29.641 | 29.671 | 28.269 | NA     | NA     | NA     | NA     | 27.413 | NA     | 29.559 |
| mmu-miR-137-3p   | NA     |
| mmu-miR-140-5p   | 28.152 | 27.146 | 26.627 | 27.333 | NA     | NA     | NA     | NA     | 26.155 | 26.734 | 26.268 |
| mmu-miR-153-3p   | NA     |
| mmu-miR-187-3p   | NA     |
| mmu-miR-374b-5p  | 28.569 | 27.628 | 29.425 | 28.144 | NA     | NA     | NA     | NA     | 29.476 | 27.541 | 27.84  |
| mmu-miR-379-5p   | NA     |
| mmu-miR-451a     | 23.992 | 23.979 | 24.89  | 24.753 | NA     | NA     | NA     | NA     | 21.791 | 19.229 | 19.787 |
| mmu-miR-491-5p   | NA     | 31.393 | 31.508 | NA     | NA     | NA     | NA     | NA     | 30.587 | 29.834 | 30.444 |
| mmu-miR-495-3p   | NA     | NA     | NA     | 31.448 | NA     | NA     | 16.638 | NA     | 27.031 | 27.472 | 28.813 |
| mmu-miR-496a-3p  | NA     |
| mmu-miR-499-5p   | NA     |
| mmu-miR-615-3p   | NA     | 29.995 | NA     | NA     | NA     |
| mmu-miR-93-5p    | 27.641 | 29.109 | 30.758 | 29.177 | NA     | NA     | NA     | NA     | 26.236 | 26.155 | 25.899 |
| mmu-miR-96-5p    | NA     |
| RNU44            | NA     | 7.537  | NA     | NA     |
| RNU48            | 30.298 | 31.118 | 28.568 | NA     | NA     | 31.883 | NA     | NA     | NA     | 30.507 | 31.918 |
| U6 snRNA         | 23.094 | 22.667 | 25.521 | 25.882 | 21.556 | 20.644 | 21.444 | 25.118 | 22.675 | 26.908 | 26.225 |
